1  
2  
3  
4  
5  
6  
7  
8  
9  
10  
11  
12  
13  
14  
15  
16  
17  
18  
19

**Submission type:** Application

**Phylostems: a new graphical tool to investigate temporal signal of heterochronous sequences at various evolutionary scales**

Anna Doizy<sup>1,2</sup>, AmauryPrin<sup>1</sup>, Guillaume Cornu<sup>3</sup>, Frederic Chiroleu<sup>1</sup> and Adrien Rieux<sup>1\*</sup>

<sup>1</sup> CIRAD, UMR PVBMT, 97410 St Pierre, La Réunion, France.

<sup>2</sup> DoAna - statistiques Réunion, F-97480 Saint-Joseph, Reunion island, France

<sup>3</sup> CIRAD, Univ Montpellier, UR Forests and Societies, Montpellier, France

\*Author to whom correspondence should be addressed: [adrien.rieux@cirad.fr](mailto:adrien.rieux@cirad.fr)

**Running title:** Phylogenetic scaling of temporal signal

## 20 Abstract

- 21 1. Molecular tip-dating of phylogenetic trees is a growing discipline that uses DNA  
22 sequences sampled at different points in time to co-estimate the timing of  
23 evolutionary events with rates of molecular evolution. Such inferences should only  
24 be performed when there is sufficient temporal signal within the analysed dataset.  
25 Hence, it is important for researchers to be able to test their dataset for the amount  
26 and consistency of temporal signal prior to any tip-dating inference. For this purpose,  
27 the most popular method considered to-date has been the “root-to-tip regression”  
28 which consist in fitting a linear regression of the number of substitutions  
29 accumulated from the root to the tips of a phylogenetic tree as a function of  
30 sampling times. The main limitation of the regression method, in its current  
31 implementation, relies in the fact that the temporal signal can only be tested at the  
32 whole-tree evolutionary scale.
- 33 2. To fill this methodological gap, we introduce phylostems, a new graphical and user-  
34 friendly tool developed to investigate temporal signal at every evolutionary scale of a  
35 phylogenetic tree.
- 36 3. Phylostems allows detecting without *a priori* whether any subset of a tree would  
37 contain sufficient temporal signal for tip-based inference to be performed. We  
38 provide a “how to” guide by running phylostems on empirical datasets and supply  
39 guidance for results interpretation. Phylostems is freely available at [https://pvbmt-  
apps.cirad.fr/apps/phylostems](https://pvbmt-<br/>40 apps.cirad.fr/apps/phylostems).

41 4. Considering the impressive increase in availability and use of heterochronous  
42 datasets, we hope the new functionality provided by phylostems will help biologists  
43 to perform thorough tip-dating inferences.

44

45 **Keywords:** Heterochronous sequence dataset, measurably-evolving populations (MEPs),  
46 phylogenetic tip-dating, R shiny app, root-to-tip regression, temporal signal.

47

48

49

50

51

52

53

54

55

56

57

58

## 59 Introduction

60 “Tip-dating” of phylogenetic trees is a popular and powerful type of genetic analysis aiming  
61 to make use of sequence data isolated at different points in time (i.e., heterochronous  
62 datasets) to co-estimate the timing of evolutionary events with rates of molecular evolution  
63 (Rieux & Balloux, 2016). Tip-dating requires working on measurably evolving populations  
64 (MEPs) which consist in datasets displaying detectable amounts of *de novo* nucleotide  
65 changes among the DNA sequences sampled at different timepoints (Drummond, Pybus,  
66 Rambaut, Forrest, & Rodrigo, 2003). Our ability to capture measurable amount of  
67 evolutionary change from sequence data is a factor of various parameters including the  
68 evolutionary rate per site per unit of time ( $\mu$ ), the width of the sampling interval ( $t$ ), the  
69 number of sites in the sequences ( $L$ ) and the time to the Most Recent Common Ancestor  
70 (MRCA) of all sequences ( $T_{MRCA}$ ). Originally, only fast-evolving organisms such as RNA viruses  
71 were classifiable as MEPs but the recent rise in our ability to sequence DNA at high  
72 throughput from both modern and ancient material has led to a massive increase in both  
73 sequence length ( $L$ ) and the timespan covered by the sequences ( $t$ ), hence opening up the  
74 field of tip-dating to a variety of additional organisms (Biek, Pybus, Lloyd-Smith, & Didelot,  
75 2015).

76 Phylogenetic inferences performed on such time-structured sequence data represent a  
77 powerful tool for hypothesis testing (Rieux & Balloux, 2016). They have notably been critical  
78 for *i*) dating key events in human evolutionary history (Fu et al., 2013; Rieux et al., 2014), *ii*)  
79 improving our understanding of various important pathogens emergence, spread and  
80 evolution (Bos et al., 2014; Faria et al., 2014; Eldholm et al., 2015; O’Hanlon et al., 2018;

81 Vanhove et al., 2019; Rambaut, 2020), *iii*) investigating the relative impacts of climatic and  
82 anthropogenic factors on the widespread extinctions of large mammals (Shapiro et al., 2004;  
83 Stiller et al., 2010), *iv*) providing meaningful information about pathogens host species jumps  
84 (Weinert et al., 2012) and *v*) estimating unknown sequence's ages in various organisms  
85 (Shapiro et al., 2011).

86 Inferences from tip-calibrated phylogenetic trees should only be performed when there is  
87 sufficient temporal signal within the analysed dataset (Drummond, Pybus, Rambaut, et al.,  
88 2003; Duchêne, Duchêne, Holmes, & Ho, 2015; Murray et al., 2016; Rieux & Balloux, 2016).  
89 This will for instance not be the case if the sampling period is too short for sufficient  
90 evolutionary changes to be measured, if evolutionary rates are too low or variable amongst  
91 lineages or if some samples have incorrectly been dated (Rambaut, Lam, Carvalho, & Pybus,  
92 2016). As such it is important for researchers to be able to test their dataset for the amount  
93 and consistency of temporal signal prior to any tip-dating inference. For this purpose, the  
94 most popular method considered to-date has been the “root-to-tip regression” which  
95 consist in fitting a linear regression of the number of substitutions accumulated from the  
96 root to the tips of a phylogenetic tree as a function of sampling times (Buonagurio et al.,  
97 1986; Shankarappa et al., 1999; Korber et al., 2000; Drummond, Pybus, & Rambaut, 2003). If  
98 sampling dates are sufficiently different, then more recently sampled sequences should have  
99 undergone substantially more evolutionary change than earlier sampled sequences, which  
100 would result in a positive correlation. This method has often been used as a diagnostic of  
101 data quality and of the reliability rate estimates, where the slope coefficient corresponds to  
102 the substitution rate under the assumption of a strict molecular clock, the X-intercept is an  
103 estimate of the date of the root of the tree and  $R^2$  indicates the degree to which sequence

104 evolution has been clocklike. However, the root-to-tip regression method is not statistically  
105 suitable for proper hypothesis testing because the individual data points are not  
106 independently distributed, and are instead partially correlated due to their phylogenetic  
107 shared ancestry (Drummond, Pybus, & Rambaut, 2003). To overcome this limitation,  
108 Navascues et al. (2010) suggested a non-parametric approach using permutations to test  
109 whether the correlation is stronger than expected if the sampling dates were randomly  
110 assigned. More recently, other phylogenetic approaches such as the date-randomization test  
111 (Ramsden, Melo, Figueiredo, Holmes, & Zanotto, 2008; Duffy & Holmes, 2009; Duchêne et  
112 al., 2015; Murray et al., 2016) or model selection/comparison (Rambaut, 2000; Murray et al.,  
113 2016; Duchene et al., 2019), although way more computationally intensive, have also been  
114 introduced and shown to be more robust tests for temporal signal detection and  
115 characterization.

116 Despite its statistical pitfalls, the regression method remains a very helpful exploration tool  
117 to quickly assess the extent of temporal signal within a dataset. It only requires a rooted  
118 molecular phylogeny (whose branch lengths represent genetic distance) estimated from  
119 heterochronous (dated) sequences and runs instantaneously. The regression method has  
120 been implemented in the popular and interactive graphical program TempEst (Rambaut et  
121 al., 2016), formerly known as Path-O-Gen. The main limitation of the regression method in  
122 its current implementation relies in the fact that the temporal signal can only be tested at  
123 the whole-dataset (tree) evolutionary scale. However, although a significant positive  
124 correlation would indicate the presence of detectable amounts of *de novo* mutations within  
125 a tree timescale, a non-positive (or a statistically non-significant) correlation does not  
126 necessarily mean that no temporal signal exists at a reduced timescale, as illustrated in Fig 1.

127 To fill this methodological gap, we introduce phylostems, a new graphical and user-friendly  
128 tool developed to investigate temporal signal at every evolutionary scales of a phylogenetic  
129 tree. Phylostems allows detecting without *a priori* whether any subset of a tree would  
130 contain sufficient temporal signal for tip-based inference to be performed. We provide a  
131 “how to” guide by running phylostems on empirical datasets and supply insights on  
132 interpreting the outputs.

### 133 **Materials and Methods**

134 The program phylostems (Phylogenetic Scaling of Temporal Signal) is an open source,  
135 graphical Shiny based R application (Chang, Cheng, Allaire, Xie, & McPherson, 2018; R Core  
136 Development Team, 2020) built for exploring temporal signal at various scales of a  
137 phylogenetic tree. Shiny is an R package that makes it easy to build interactive web  
138 applications from R (<https://shiny.rstudio.com/>). Phylostems can be either used online at  
139 <https://pvbmt-apps.cirad.fr/apps/phylostems/> or executed locally by downloading its source  
140 code from <https://gitlab.com/cirad-apps/phylostems>. A schematic representation of  
141 phylostems workflow is presented in Fig. 2.

142 As input, phylostems requires (i) a phylogenetic tree in computer-readable Nexus or Newick  
143 format with branch lengths scaled as genetic distances only, such as the ones computed  
144 using maximum likelihood approaches (e.g. Guindon et al., 2010; Minh et al., 2020;  
145 Stamatakis, 2014). In its current implementation, the online version of phylostems allows  
146 uploading trees with 1500 sequences at maximum. Larger trees will need to be processed  
147 locally by sourcing the gitlab version. (ii) Prior to be loaded in phylostems, the tree needs to  
148 be rooted, either at a position chosen by the user (with an outgroup) or at a most

149 compatible location with the assumption of a strict molecular clock (using for instance the  
150 rtt function from the ape R package (Paradis & Schliep, 2019)). When possible, we advise to  
151 use outgroup-rooted trees. Finally, *(iii)* sampling/isolation dates needs to be known for each  
152 sequences and specified within tip labels. Before-Christ (B.C) dates, sometimes required to  
153 handle sequences generated from ancient DNA data can be specified using negative values  
154 (e.g. - 400.5). Note that since missing dates are not allowed, sequences with unknown  
155 sampling years needs to be pruned out from the tree (using for instance the drop.tip  
156 function from the ape R package) prior to be uploaded in phylostems.

157 When a tree has correctly been loaded in phylostems, a distribution of sampling dates is  
158 plotted within the “upload” panel allowing for a visual check of sequences temporal width.  
159 At this stage, the phylogenetic tree has been loaded using the ape R package and root-to-tip  
160 distances for all sequences are recorded. Temporal signal is hence tested at every node of  
161 the input tree (including its root) meeting the following conditions required to perform a  
162 linear regression: *i)* the node must be the parent of at least  $n=3$  tips, *ii)* there should be at  
163 least  $n=3$  distinct combination of root-to-tip distances and sampling dates and *iii)* there  
164 should be at least  $n=2$  different sampling dates. At each of such nodes, linear regression  
165 between sampling dates and root-to-tip distances is performed and the following  
166 parameters: (1) p-value, (2) slope, (3) adjusted  $R^2$ , and (4) intercept with the x-axis values are  
167 recorded.

168 Phylostems’s main results are provided within the “Temporal signal” panel. First an  
169 annotated phylogenetic tree is interactively plotted by sourcing both ggtree and plotly  
170 packages (Yu, Smith, Zhu, Guan, & Lam, 2017; Sievert, 2020). On this tree, nodes with



171 temporal signal, *i.e.* nodes at which root-to-tip linear regression yielded a statistically  
172 significant and positive slope, are highlighted with colours scaling to  $R^2$  value. The default  
173 threshold for the linear regression p-value has been fixed to 0.05 but the user can  
174 interactively modify it using a slider bar, which enable easy investigation of nodes with  
175 borderline significant trends. A table summarizing the nodes with temporal signal is also  
176 displayed along with respective number of descending sequences, p-value, slope and  
177 adjusted  $R^2$  values. Most importantly, phylostems allow the user to visualize the root-to-tip  
178 regressions at any chosen node of interest. To do so, the user simply needs to click on a  
179 node, and the associated root-to-tip regression will be displayed. Both the tree and the root-  
180 to-tip regression plots are linked, so that data points (or tree tips) selected in one plot will  
181 automatically be highlighted on the other one. This enables easy investigation of outliers and  
182 sequences or clades of interest.

183 Finally, when temporal signal is found at the within-tree scale, phylostems's "Make new  
184 FASTA" panel allows generating a new subset sequence FASTA file that only include the  
185 variant sites for the descending tips of a node of interest, a dataset suitable for further tip-  
186 dating inferences.

187 In the following, we use two previously published empirical datasets to illustrate how  
188 phylostems allows users exploring temporal signal at various evolutionary scales within  
189 phylogenetic trees. For both datasets, we downloaded rooted-ML tree files built from non-  
190 recombining genomic sequences from their original publications. The first dataset contains  
191 45 strains of *Xyella fastidiosa* (hereafter *Xf*) sampled worldwide between 1983 and 2016  
192 (Vanhove et al., 2019). *Xf* is a bacterial crop pathogen of global importance, currently

193 threatening agriculture in various European countries (Sicard et al., 2018). The second  
194 dataset comprises 98 hantaviruses isolates sampled from bank voles in Belgium between  
195 1984 and 2016 (Laenen et al., 2019). Hantaviruses are important zoonotic viral pathogens  
196 that can cause hemorrhagic fever with renal syndrome and pulmonary syndrome, potentially  
197 life-threatening diseases in humans (Maes, Clement, Gavrillovskaya, & Van Ranst, 2004).

## 198 **Results**

### 199 *Xf* dataset

200 We first loaded the *Xf* rooted tree within phyloSTEMS's "upload" panel (see Fig. 3). Looking  
201 at the plot of the sampling dates distribution, one can perform a quick visual check of  
202 sequences temporal width (here 1983-2016) to validate the data importation process.  
203 Moving to the "Temporal signal" panel, phyloSTEMS displays the *Xf* phylogenetic tree on  
204 which the structuration by the four subspecies: *ssp. pauca*, *multiplex*, *morus*, *fastidiosa* can  
205 be easily distinguished (see Fig. 4A). Visual inspection of the *Xf* tree in phyloSTEMS  
206 demonstrated a lack of strong and deep temporal signal as neither the root nor the MRCA of  
207 each subspecies displayed any significant correlation between root-to-tip distances and  
208 sampling ages, as highlighted by the absence of annotations at those nodes. PhyloSTEMS  
209 detected only one internal node (node 82) associated with temporal signal within the *Xf*  
210 tree. This node is the MRCA of a small clade containing 9 samples within the *Xf pauca ssp*  
211 clade. When clicking on this node, phyloSTEMS displays the associated root-to-tip regression  
212 plot and parameters ( $R^2 = 0.38$ , slope =  $6.9E-7$ , P-val = 0.045, see Fig.4 B). According to  
213 phyloSTEMS's results, this small clade (N=9 sample) is the only evolutionary scale suitable for  
214 phylogenetic tip-based inferences in BEAST or other programs within the *Xf* dataset. To do

215 so, the “Make new FASTA” panel allows generating a new sequence file that only include the  
216 variant sites for the 9 *Xf* samples within the clade with detected temporal signal.

### 217 Hantaviruses dataset

218 Visual inspection of the Hantaviruses tree in phylostems demonstrated heterogenous  
219 temporal signal amongst clades, here referring to three geographical sampling areas namely  
220 Ardennes, Campine and Sonian Forest (Fig 5.A). Phylostems revealed a lack of temporal  
221 signal both at the whole tree scale and for the Sonian Forest clade. Temporal signal was  
222 observed at the MRCA of the Campine and Ardennes clades as well as within the Ardennes  
223 clade, as represented by the several highlighted nodes on the tree. A table listing all the  
224 nodes associated with temporal signal along with their associated statistics is given in Fig  
225 5.B. When plotting the regression at the MRCA of the Campine and Ardennes clades,  
226 phylostems allows visually identifying outlier samples that are significantly deviating from  
227 the root-to-tip regression line (Fig 5.C). Here, all outliers fell within the Campine clade,  
228 suggesting that phylogenetic tip-based inferences should not be performed on both the  
229 Campine and Ardennes clades simultaneously. Possible causes for such outliers are multiple  
230 and will be argued in the discussion section.

### 231 **Discussion**

232 We introduce phylostems, a new graphical and user-friendly tool developed to investigate  
233 temporal signal within phylogenetic trees using the root-to-tip regression method. Previous  
234 implementations of this method, such as for instance in the popular and interactive  
235 graphical program TempEst (Rambaut et al., 2016) were designed to test temporal signal at  
236 the whole tree scale (i.e. at its root). Investigating temporal signal at smaller evolutionary

237 scales was previously doable, but this task required the user to *i) a priori* decide at which  
238 scale (i.e. on which samples) performing the test and *ii) manually* splitting or reconstructing  
239 the tree for every of such scales. The main improvement of phylostems is to allow detecting,  
240 in a single step and without *a priori*, any evolutionary scale at which temporal signal may  
241 exist within a phylogenetic tree.

242 Exploring the degree of temporal signal in heterochronous sequences datasets before  
243 proceeding to inference using formal molecular clock models is a crucial task (Rieux &  
244 Balloux, 2016). As illustrated by the two empirical datasets analyzed in this study, temporal  
245 signal may sometimes be heterogeneous within a tree with substantial differences between  
246 clades. In such cases, we hope that phylostems will help researchers detecting the most  
247 appropriate scales, if any, at which thorough tip-based inferences may be performed.  
248 However, because of the statistical pitfalls associated with the root-to-tip regression method  
249 (Rambaut, 2000; Rambaut et al., 2016), phylostems should rather be seen as a fast, visual  
250 and qualitative data exploration tool for temporal signal detection but should not be used to  
251 test hypotheses or undertake statistical model selection. Once temporal signal has been  
252 detected in phylostems, we advise users to make use of other available methods such as  
253 non-parametric permutations (Navascués et al., 2010), date-randomization test (Ramsden et  
254 al., 2008; Duffy & Holmes, 2009; Duchêne et al., 2015; Murray et al., 2016) or model  
255 selection/comparison (Murray et al., 2016; Duchene et al., 2019) to validate the existence of  
256 measurably evolving populations in their datasets.

257 Finally, phylostems can also help identifying outliers or groups of samples that substantially  
258 differ from the root-to-tip regression line and may require careful handling to avoid bias

259 during phylogenetic inferences. First, as illustrated by the analyse of the Hantaviruses  
260 dataset, different clades or populations in a tree may be characterized by positive but  
261 contrasted root-to-tip regression patterns that might arise from sampling bias or differences  
262 in life-history traits between clades (e.g. environmental factors, population density,  
263 evolutionary rates or epidemiological parameters). In such a case, it is suggested to perform  
264 independent phylogenetic inferences on each clade/population (Laenen et al., 2019). In  
265 other cases, outlier sequences whose sampling date is incongruent with their genetic  
266 divergence and phylogenetic position can be spotted from the regression plot (Rambaut et  
267 al., 2016). Such anomalies can reflect a problem with *i)* the sequence itself (e.g. low quality,  
268 sequencing/assembly/alignment errors, recombination or hypermutation) or *ii)* the sampling  
269 date(s) (e.g. mislabelling or biological contamination). Should the case of such outlier  
270 sequences arise, those samples should be excluded from subsequent phylogenetic  
271 inferences.

272 Considering the impressive increase in availability and use of heterochronous datasets, we  
273 hope the functionality provided by phylostems will help users to perform thorough tip-  
274 dating inferences. Pylostems is a dynamic application by nature. New functions will be added  
275 as new needs arise.

276

277

278

279

## 280 **Acknowledgements**

281 This work was financially supported by l'Agence Nationale pour la Recherche (JCJC  
282 MUSEOBACT contrat ANR-17-CE35-0009-01), the European Regional Development Fund  
283 (ERDF contract GURDT I2016-1731-0006632), Région Réunion and the French Agropolis  
284 Foundation (Labex Agro – Montpellier, E-SPACE project number 1504-004). We are grateful  
285 to S. Falala for his advices on building Shiny apps and CIRAD for providing hosting of the  
286 application server. We thank R. Almeida, M. Vanhove & B. Vrancken for providing access to  
287 the empirical datasets analyzed in this study. We also thank L. van Dorp, P. Campos, C.G.  
288 Crego, E. Conte, T.T CAO, F. Balloux & D. Richard for interesting discussions and testing  
289 previous versions of the app on their own datasets.

290

## 291 **Data availability**

292 Phylostems can be executed online at <https://pvbmt-apps.cirad.fr/apps/phylostems/> but  
293 source code can also be downloaded from <https://gitlab.com/cirad-apps/phylostems> for  
294 local implementation. The two empirical trees used in this paper (Hantaviruses and *Xylella*  
295 *fastidiosa*) are accessible from the gitlab repository.

## 296 **Authors contribution**

297 A.R initially conceptualized the method. A.P generated a first version of the code. A.D  
298 improved it and converted it into a Shiny application with advices from A.R, G.C & F.C. G.C  
299 managed the online implementation & maintenance of the app. A.D & A.R wrote the first  
300 draft and all authors contributed to the final version.

301 **References**

- 302 Biek, R., Pybus, O. G., Lloyd-Smith, J. O., & Didelot, X. (2015, June 1). Measurably evolving  
303 pathogens in the genomic era. *Trends in Ecology and Evolution*. Elsevier Ltd.  
304 doi:10.1016/j.tree.2015.03.009
- 305 Bos, K. I., Harkins, K. M., Herbig, A., Coscolla, M., Weber, N., Comas, I., ... Krause, J. (2014).  
306 Pre-Columbian mycobacterial genomes reveal seals as a source of New World human  
307 tuberculosis. *Nature*, *514*(7253), 494–497. doi:10.1038/nature13591
- 308 Buonagurio, D. A., Nakada, S., Parvin, J. D., Krystal, M., Palese, P., & Fitch, W. M. (1986).  
309 Evolution of human influenza A viruses over 50 years: Rapid, uniform rate of change in  
310 NS gene. *Science*, *232*(4753), 980–982. doi:10.1126/science.2939560
- 311 Chang, W., Cheng, J., Allaire, J., Xie, Y., & McPherson, J. (2018). shiny: Web Application  
312 Framework for R. <https://CRAN.R-Project.Org/Package=shiny>. Comprehensive R Archive  
313 Network (CRAN). Retrieved from <https://cran.r-project.org/package=shiny>
- 314 Drummond, A., Pybus, O. G., & Rambaut, A. (2003). Inference of Viral Evolutionary Rates  
315 from Molecular Sequences. *Advances in Parasitology*. Academic Press.  
316 doi:10.1016/S0065-308X(03)54008-8
- 317 Drummond, A., Pybus, O. G., Rambaut, A., Forrest, S. A., & Rodrigo, A. G. (2003, September  
318 1). Measurably evolving populations. *Trends in Ecology and Evolution*. Elsevier Ltd.  
319 doi:10.1016/S0169-5347(03)00216-7
- 320 Duchêne, S., Duchêne, D., Holmes, E. C., & Ho, S. Y. W. (2015). The Performance of the Date-  
321 Randomization Test in Phylogenetic Analyses of Time-Structured Virus Data. *Molecular  
322 Biology and Evolution*, *32*(7), 1895–1906. doi:10.1093/molbev/msv056
- 323 Duchene, S., Lemey, P., Stadler, T., Ho, S. Y., Duchêne, D., Dhanasekaran, V., & Baele, G.  
324 (2019). Bayesian Evaluation of Temporal Signal in Measurably Evolving Populations.  
325 *BioRxiv*. doi:<https://doi.org/10.1101/810697>
- 326 Duffy, S., & Holmes, E. C. (2009). Validation of high rates of nucleotide substitution in  
327 geminiviruses: Phylogenetic evidence from East African cassava mosaic viruses. *Journal  
328 of General Virology*, *90*(6), 1539–1547. doi:10.1099/vir.0.009266-0
- 329 Eldholm, V., Monteserin, J., Rieux, A., Lopez, B., Sobkowiak, B., Ritacco, V., & Balloux, F.  
330 (2015). Four decades of transmission of a multidrug-resistant Mycobacterium  
331 tuberculosis outbreak strain. *Nature Communications*, *6*. doi:10.1038/ncomms8119
- 332 Faria, N. R., Rambaut, A., Suchard, M. A., Baele, G., Bedford, T., Ward, M. J., ... Lemey, P.  
333 (2014). The early spread and epidemic ignition of HIV-1 in human populations. *Science*,  
334 *346*(6205), 56–61. doi:10.1126/science.1256739
- 335 Fu, Q., Mittnik, A., Johnson, P. L. F., Bos, K., Lari, M., Bollongino, R., ... Krause, J. (2013). A  
336 revised timescale for human evolution based on ancient mitochondrial genomes.

- 337 *Current Biology*, 23(7), 553–559. doi:10.1016/j.cub.2013.02.044
- 338 Guindon, S., Dufayard, J. F., Lefort, V., Anisimova, M., Hordijk, W., & Gascuel, O. (2010). New  
339 algorithms and methods to estimate maximum-likelihood phylogenies: Assessing the  
340 performance of PhyML 3.0. *Systematic Biology*, 59(3), 307–321.  
341 doi:10.1093/sysbio/syq010
- 342 Korber, B., Muldoon, M., Theiler, J., Gao, F., Gupta, R., Lapedes, A., ... Bhattacharya, T.  
343 (2000). Timing the ancestor of the HIV-1 pandemic strains. *Science*, 288(5472), 1789–  
344 1796. doi:10.1126/science.288.5472.1789
- 345 Laenen, L., Vergote, V., Vanmechelen, B., Tersago, K., Baele, G., Lemey, P., ... Maes, P. (2019).  
346 Identifying the patterns and drivers of Puumala hantavirus enzootic dynamics using  
347 reservoir sampling. *Virus Evolution*, 5(1). doi:10.1093/ve/vez009
- 348 Maes, P., Clement, J., Gavrilovskaya, I., & Van Ranst, M. (2004). Hantaviruses: Immunology,  
349 treatment, and prevention. *Viral Immunology*. Mary Ann Liebert Inc.  
350 doi:10.1089/vim.2004.17.481
- 351 Minh, B. Q., Schmidt, H. A., Chernomor, O., Schrempf, D., Woodhams, M. D., von Haeseler,  
352 A., & Lanfear, R. (2020). IQ-TREE 2: New Models and Efficient Methods for Phylogenetic  
353 Inference in the Genomic Era. *Molecular Biology and Evolution*, 37(5), 1530–1534.  
354 doi:10.1093/molbev/msaa015
- 355 Murray, G. G. R., Wang, F., Harrison, E. M., Paterson, G. K., Mather, A. E., Harris, S. R., ...  
356 Welch, J. J. (2016). The effect of genetic structure on molecular dating and tests for  
357 temporal signal. *Methods in Ecology and Evolution*, 7(1), 80–89. doi:10.1111/2041-  
358 210X.12466
- 359 Navascués, M., Depaulis, F., & Emerson, B. C. (2010). Combining contemporary and ancient  
360 DNA in population genetic and phylogeographical studies. *Molecular Ecology Resources*,  
361 10(5), 760–772. doi:10.1111/j.1755-0998.2010.02895.x
- 362 O’Hanlon, S. J., Rieux, A., Farrer, R. A., Rosa, G. M., Waldman, B., Bataille, A., ... Fisher, M. C.  
363 (2018). Recent Asian origin of chytrid fungi causing global amphibian declines. *Science*,  
364 360(6389), 621–627. doi:10.1126/science.aar1965
- 365 Paradis, E., & Schliep, K. (2019). ape 5.0: an environment for modern phylogenetics and  
366 evolutionary analyses in R. *Bioinformatics*, 35(3), 526–528.  
367 doi:10.1093/bioinformatics/bty633
- 368 R Core Development Team. (2020). R: a language and environment for statistical computing,  
369 3.2.1. Document Freely Available on the Internet at: [Http://Www. r-Project. Org](Http://Www.r-Project.Org).  
370 Vienna, Austria: R Foundation for Statistical Computing.  
371 doi:10.1017/CBO9781107415324.004
- 372 Rambaut, A. (2000). Estimating the rate of molecular evolution: Incorporating non-  
373 contemporaneous sequences into maximum likelihood phylogenies. *Bioinformatics*,  
374 16(4), 395–399. doi:10.1093/bioinformatics/16.4.395



- 375 Rambaut, A. (2020). Phylogenetic analysis of nCoV-2019 genomes. Retrieved from  
376 <http://virological.org/t/356>
- 377 Rambaut, A., Lam, T. T., Carvalho, L. M., & Pybus, O. G. (2016). Exploring the temporal  
378 structure of heterochronous sequences using TempEst (formerly Path-O-Gen). *Virus*  
379 *Evolution*, 2(1). doi:10.1093/VE/VEW007
- 380 Ramsden, C., Melo, F. L., Figueiredo, L. M., Holmes, E. C., & Zanotto, P. M. A. (2008). High  
381 Rates of Molecular Evolution in Hantaviruses. *Molecular Biology and Evolution*, 25(7),  
382 1488–1492. doi:10.1093/molbev/msn093
- 383 Rieux, A., & Balloux, F. (2016, May 1). Inferences from tip-calibrated phylogenies: A review  
384 and a practical guide. *Molecular Ecology*. Blackwell Publishing Ltd.  
385 doi:10.1111/mec.13586
- 386 Rieux, A., Eriksson, A., Li, M., Sobkowiak, B., Weinert, L. A., Warmuth, V., ... Balloux, F.  
387 (2014). Improved Calibration of the Human Mitochondrial Clock Using Ancient  
388 Genomes. *Molecular Biology and Evolution*, 31(10), 2780–2792.  
389 doi:10.1093/molbev/msu222
- 390 Shankarappa, R., Margolick, J. B., Gange, S. J., Rodrigo, A. G., Upchurch, D., Farzadegan, H., ...  
391 Mullins, J. I. (1999). Consistent Viral Evolutionary Changes Associated with the  
392 Progression of Human Immunodeficiency Virus Type 1 Infection. *Journal of Virology*,  
393 73(12), 10489–10502. doi:10.1128/jvi.73.12.10489-10502.1999
- 394 Shapiro, B., Drummond, A. J., Rambaut, A., Wilson, M. C., Matheus, P. E., Sher, A. V., ...  
395 Cooper, A. (2004). Rise and fall of the Beringian steppe bison. *Science*, 306(5701), 1561–  
396 1565. doi:10.1126/science.1101074
- 397 Shapiro, B., Ho, S. Y., Drummond, A., Suchard, M. A., Pybus, O. G., & Rambaut, A. (2011). A  
398 Bayesian Phylogenetic Method to Estimate Unknown Sequence Ages. *Molecular Biology*  
399 *and Evolution*, 28(2), 879–887. doi:10.1093/molbev/msq262
- 400 Sicard, A., Zeilinger, A. R., Vanhove, M., Schartel, T. E., Beal, D. J., Daugherty, M. P., &  
401 Almeida, R. P. P. (2018). *Xylella fastidiosa* : Insights into an Emerging Plant Pathogen.  
402 *Annual Review of Phytopathology*, 56(1), 181–202. doi:10.1146/annurev-phyto-080417-  
403 045849
- 404 Sievert, C. (2020). *Interactive Web-Based Data Visualization with R, plotly, and shiny*.  
405 Chapman and Hall/CRC.
- 406 Stamatakis, A. (2014). RAxML version 8: A tool for phylogenetic analysis and post-analysis of  
407 large phylogenies. *Bioinformatics*, 30(9), 1312–1313.  
408 doi:10.1093/bioinformatics/btu033
- 409 Stiller, M., Baryshnikov, G., Bocherens, H., Grandal d'Anglade, A., Hilpert, B., Munzel, S. C., ...  
410 Knapp, M. (2010). Withering Away--25,000 Years of Genetic Decline Preceded Cave  
411 Bear Extinction. *Molecular Biology and Evolution*, 27(5), 975–978.  
412 doi:10.1093/molbev/msq083

413 Vanhove, M., Retchless, A. C., Sicard, A., Rieux, A., Coletta-Filho, H. D., De La Fuente, L., ...  
414 Almeida, R. P. P. (2019). Genomic diversity and recombination among *Xylella fastidiosa*  
415 subspecies. *Applied and Environmental Microbiology*, *85*(13). doi:10.1128/AEM.02972-  
416 18

417 Weinert, L. A., Welch, J. J., Suchard, M. A., Lemey, P., Rambaut, A., & Fitzgerald, J. R. (2012).  
418 Molecular dating of human-to-bovid host jumps by *Staphylococcus aureus* reveals an  
419 association with the spread of domestication. *Biology Letters*, *8*(5), 829–832.  
420 doi:10.1098/rsbl.2012.0290

421 Yu, G., Smith, D. K., Zhu, H., Guan, Y., & Lam, T. T. (2017). ggtree: an r package for  
422 visualization and annotation of phylogenetic trees with their covariates and other  
423 associated data. *Methods in Ecology and Evolution*, *8*(1), 28–36. doi:10.1111/2041-  
424 210X.12628

425

426

427

428

429

430

431

432

433

434

435

436

437

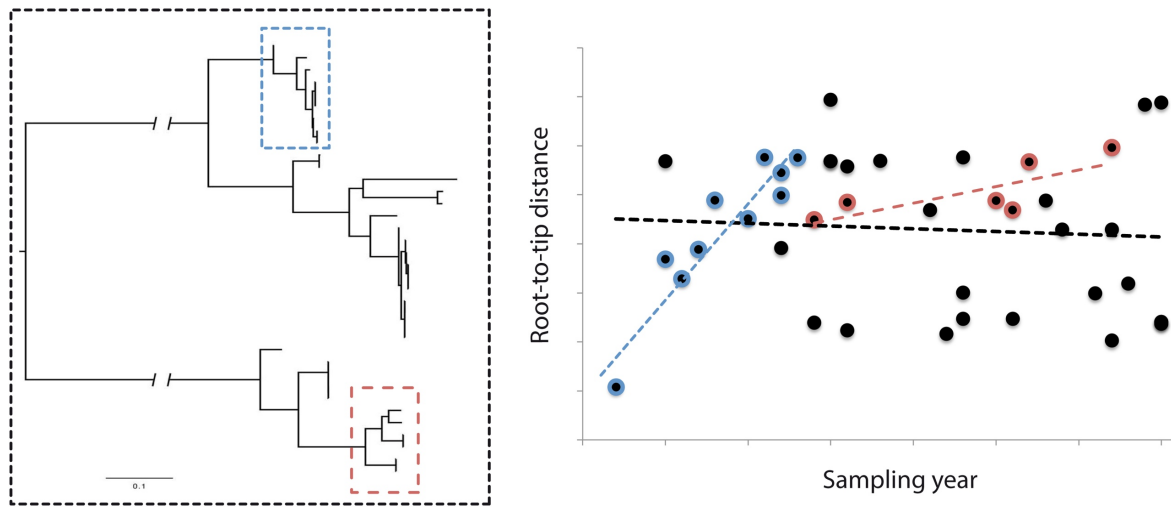

438

439

440 **Fig. 1.** Let's a tree (left panel) be constructed from a dataset of heterochronous sequences.  
441 When investigating temporal signal on the whole dataset using the regular root-to-tip  
442 regression method (right panel), no significant signal was found as the slope of the  
443 regression (black dotted line) appears to be non-positive. Hence, tip-based inferences should  
444 not be performed at the whole dataset timescale. However, as illustrated by the red and  
445 blue positive regression slopes calculated on two subsets of samples (red and blue squares  
446 on the tree), positive temporal signal exists at reduced evolutionary timescales at which  
447 thorough tip-based inferences could be performed. The main objective of phyloSTEMS is to  
448 provide the user with a graphical tool to detect without *a priori* such evolutionary clades.

449

450

451

452

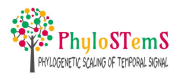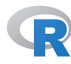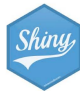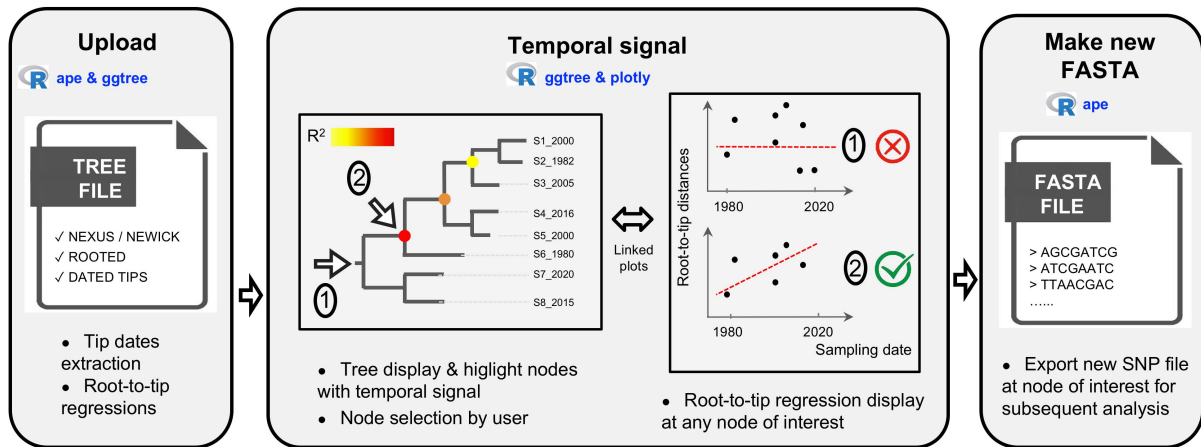

453  
454 **Fig. 2.** Schematic representation of phylostems workflow. Main boxes (“Upload”, “Temporal  
455 signal” & “Make new FASTA”) represent the internal structure of the application organized in  
456 three main panels. Major tasks performed in each panel are summarized along with sourced  
457 R packages.

458

459

460

461

462

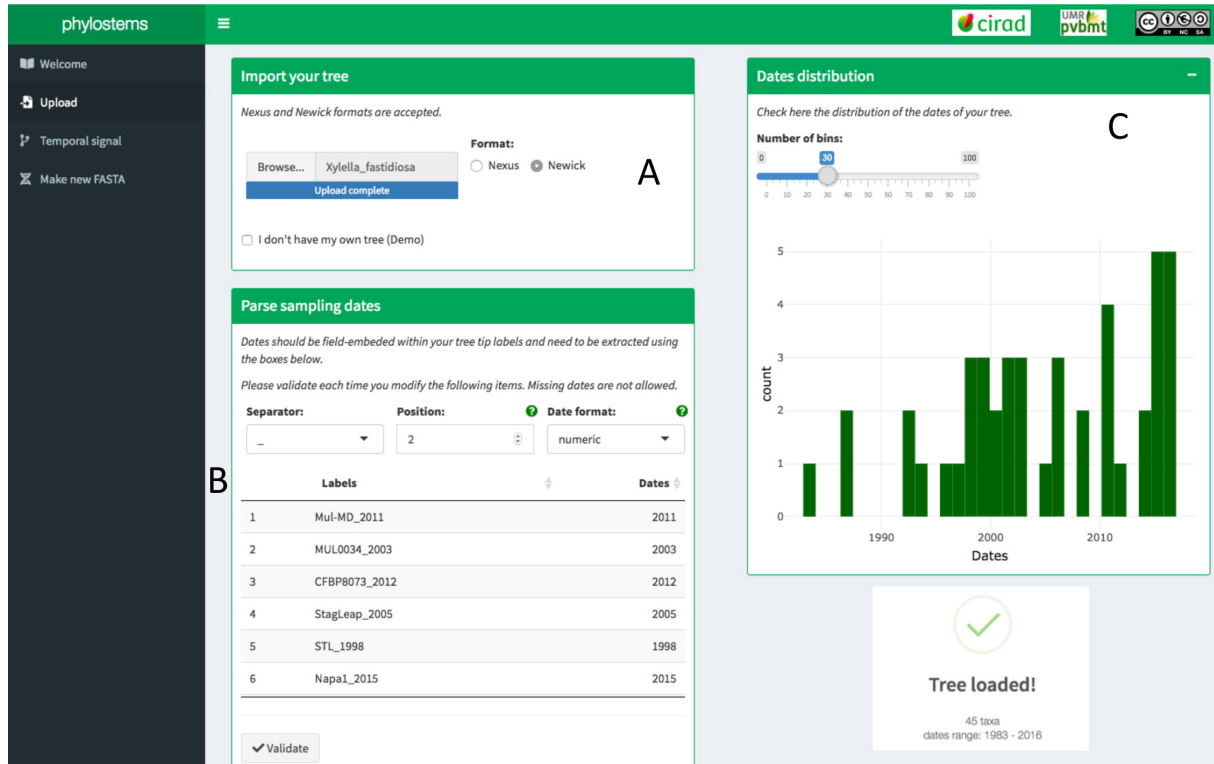

463

464

465 **Fig. 3.** Phylostems 's upload panel requesting the user to load a phylogenetic tree (A) and  
466 specify tip sampling dates from field-embedded values (B). Once loaded, a distribution of  
467 sampling dates is plotted allowing for a visual check of sequences temporal width (C).

468

469

470

471

472

473

474

475

476

477

478

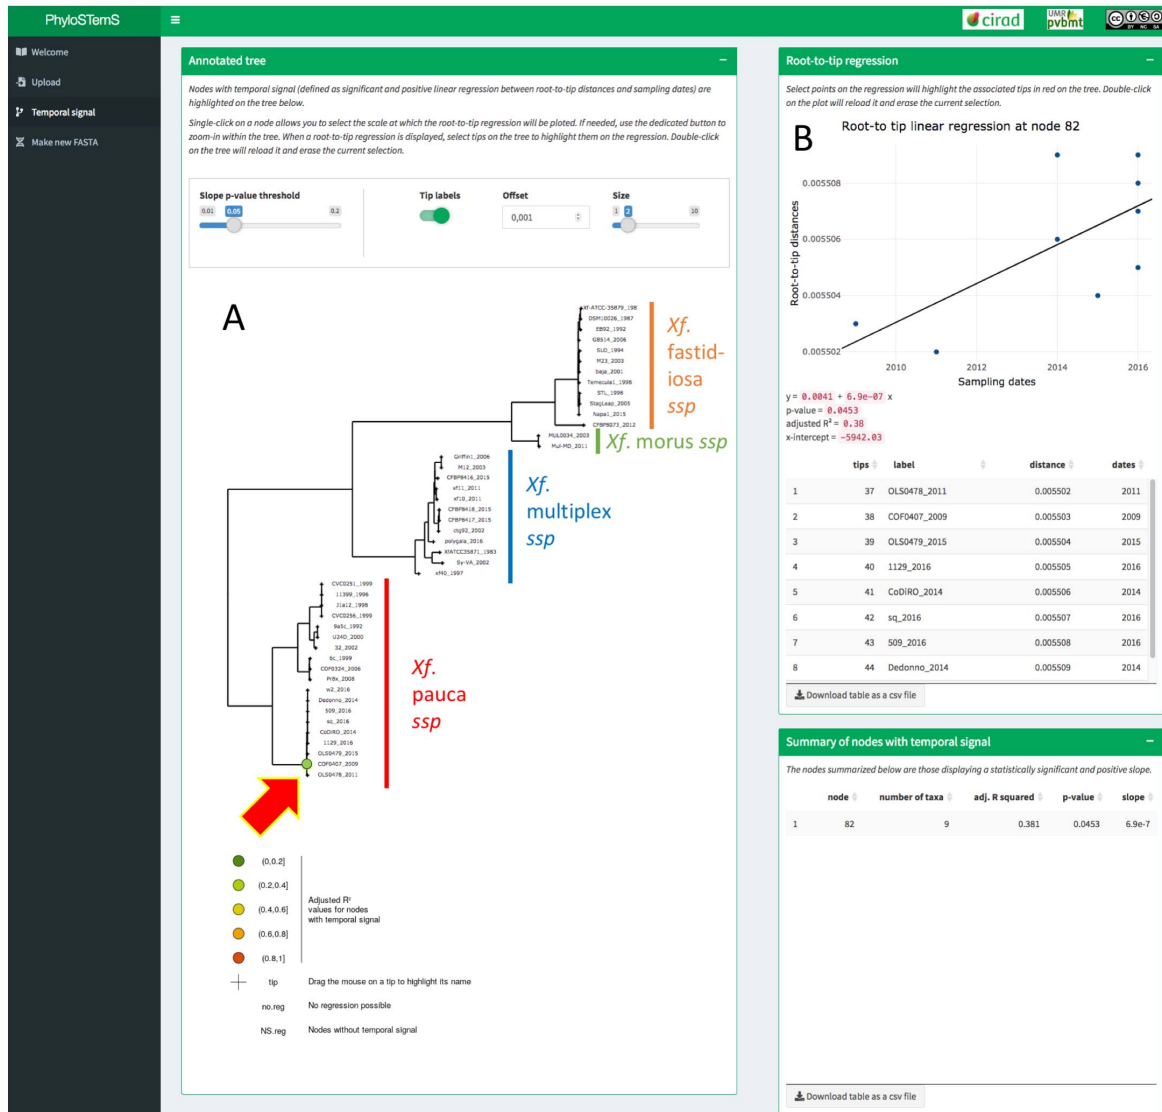

479

480 **Fig. 4.** Annotated phylogenetic tree of *Xylella fastidiosa* empirical dataset (A). Red arrow  
 481 indicates the only node at which temporal signal was found. Root-to-tip regression at this  
 482 node, along with associated parameters are plotted in (B).

483

484

485

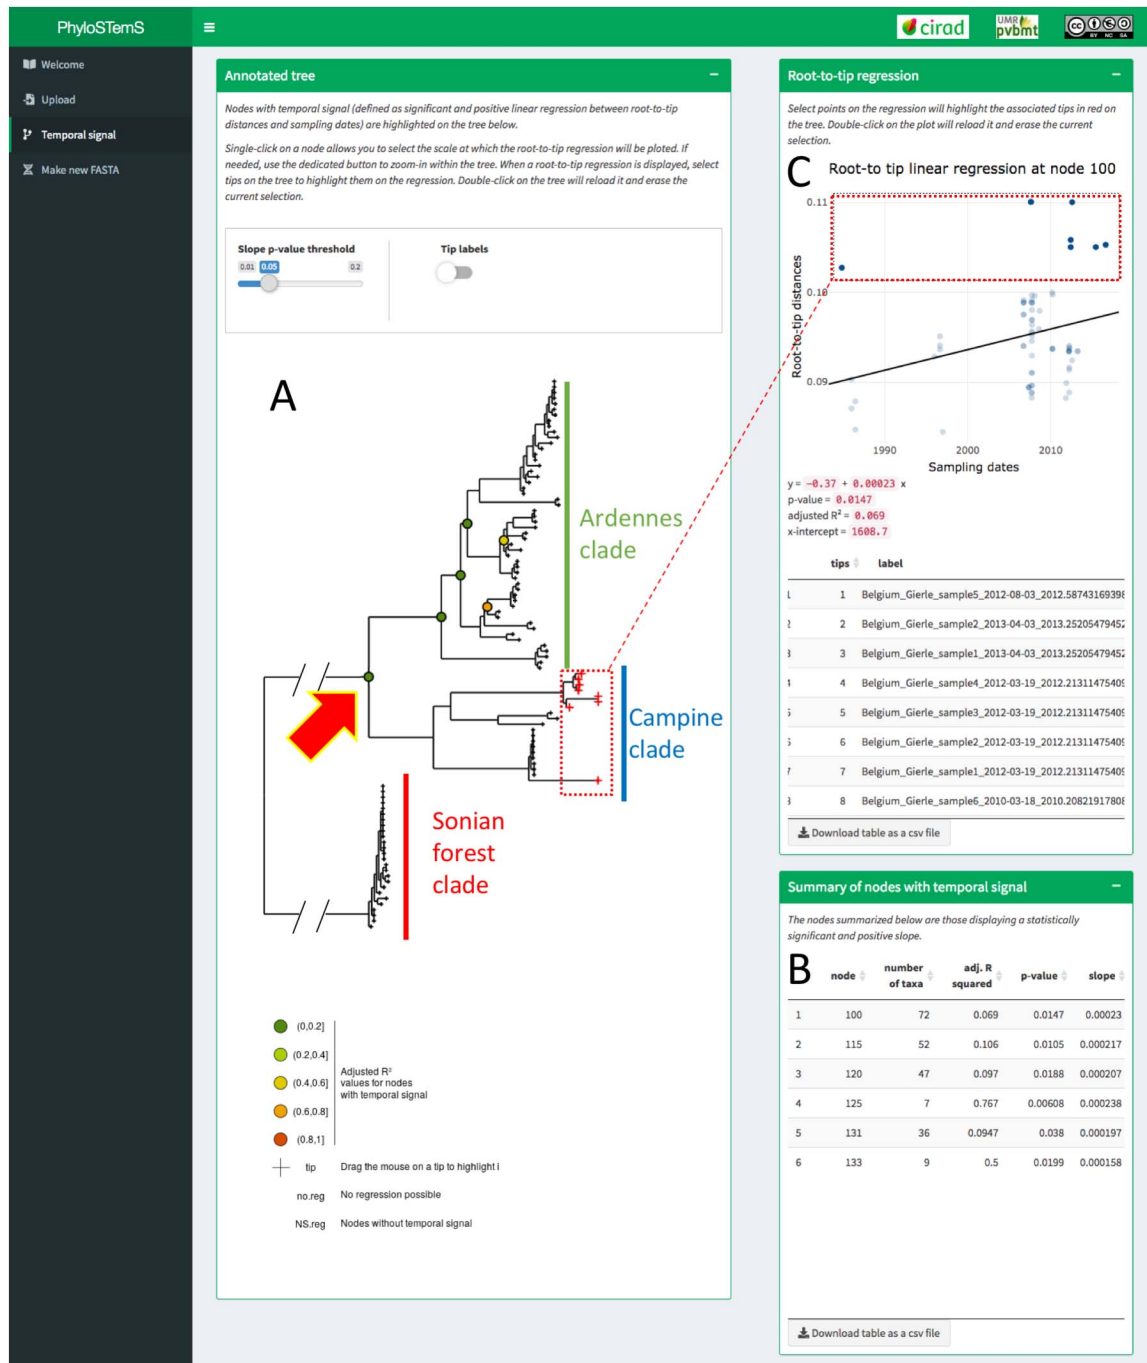

486

487

488 **Fig. 5.** Annotated phylogenetic tree for the Hantaviruses empirical dataset (A). Coloured  
 489 circles indicate nodes at which temporal signal was found. A table summarizing those nodes,  
 490 along with associated linear regression parameters is given in (B). Root-to-tip regression at  
 491 node highlighted by the red arrow is plotted in (C). Both the tree and the regression plots are  
 492 linked, so that data points (or tree tips) selected in one plot will automatically be highlighted  
 493 on the other one, as illustrated by the red-dotted frames.

494
